# Supplementary material
Source: PubMed Central journal article supplement (PMC3700312)

## Supplemental figure legends

**Figure S1.** Temporal and geographical differences in the distance of southeast Asian strains to RV144 immunogens. a) Protein distance of RV148 CRF01\_AE and B/CRF01\_AE recombinants whose *gp120* region is CRF01\_AE, and published HIV-1 CRF01\_AE strains sampled in East and Southeast Asia, to the 92TH023 Gp120 linked to LAI gp41 immunogen presented in the ALVAC-HIV. b) Protein distance of RV148 CRF01\_AE and B/CRF01\_AE recombinants whose *gp120* region is CRF01\_AE, and published HIV-1 CRF01\_AE strains sampled in East and Southeast Asia, to the CM244 Gp120 immunogen presented in the AIDSVAX B/E. c) Protein distance of RV148 subtype B and B/CRF01\_AE recombinants whose *gp120* region is subtype B, and published HIV-1 subtype B strains sampled in East and Southeast Asia, to the MN Gp120 immunogen presented in the AIDSVAX B/E. d) Protein distance of RV148 strains to subtype B and B/CRF01\_AE recombinants whose *gag-pro* region is subtype B, and published HIV-1 subtype B strains sampled in East and Southeast Asia, to the LAI Gag immunogen presented in the ALVAC-HIV. Each point in the charts depicts an RV148 (hollow circles) or published strain (full circle). The country and year of sampling are indicated.

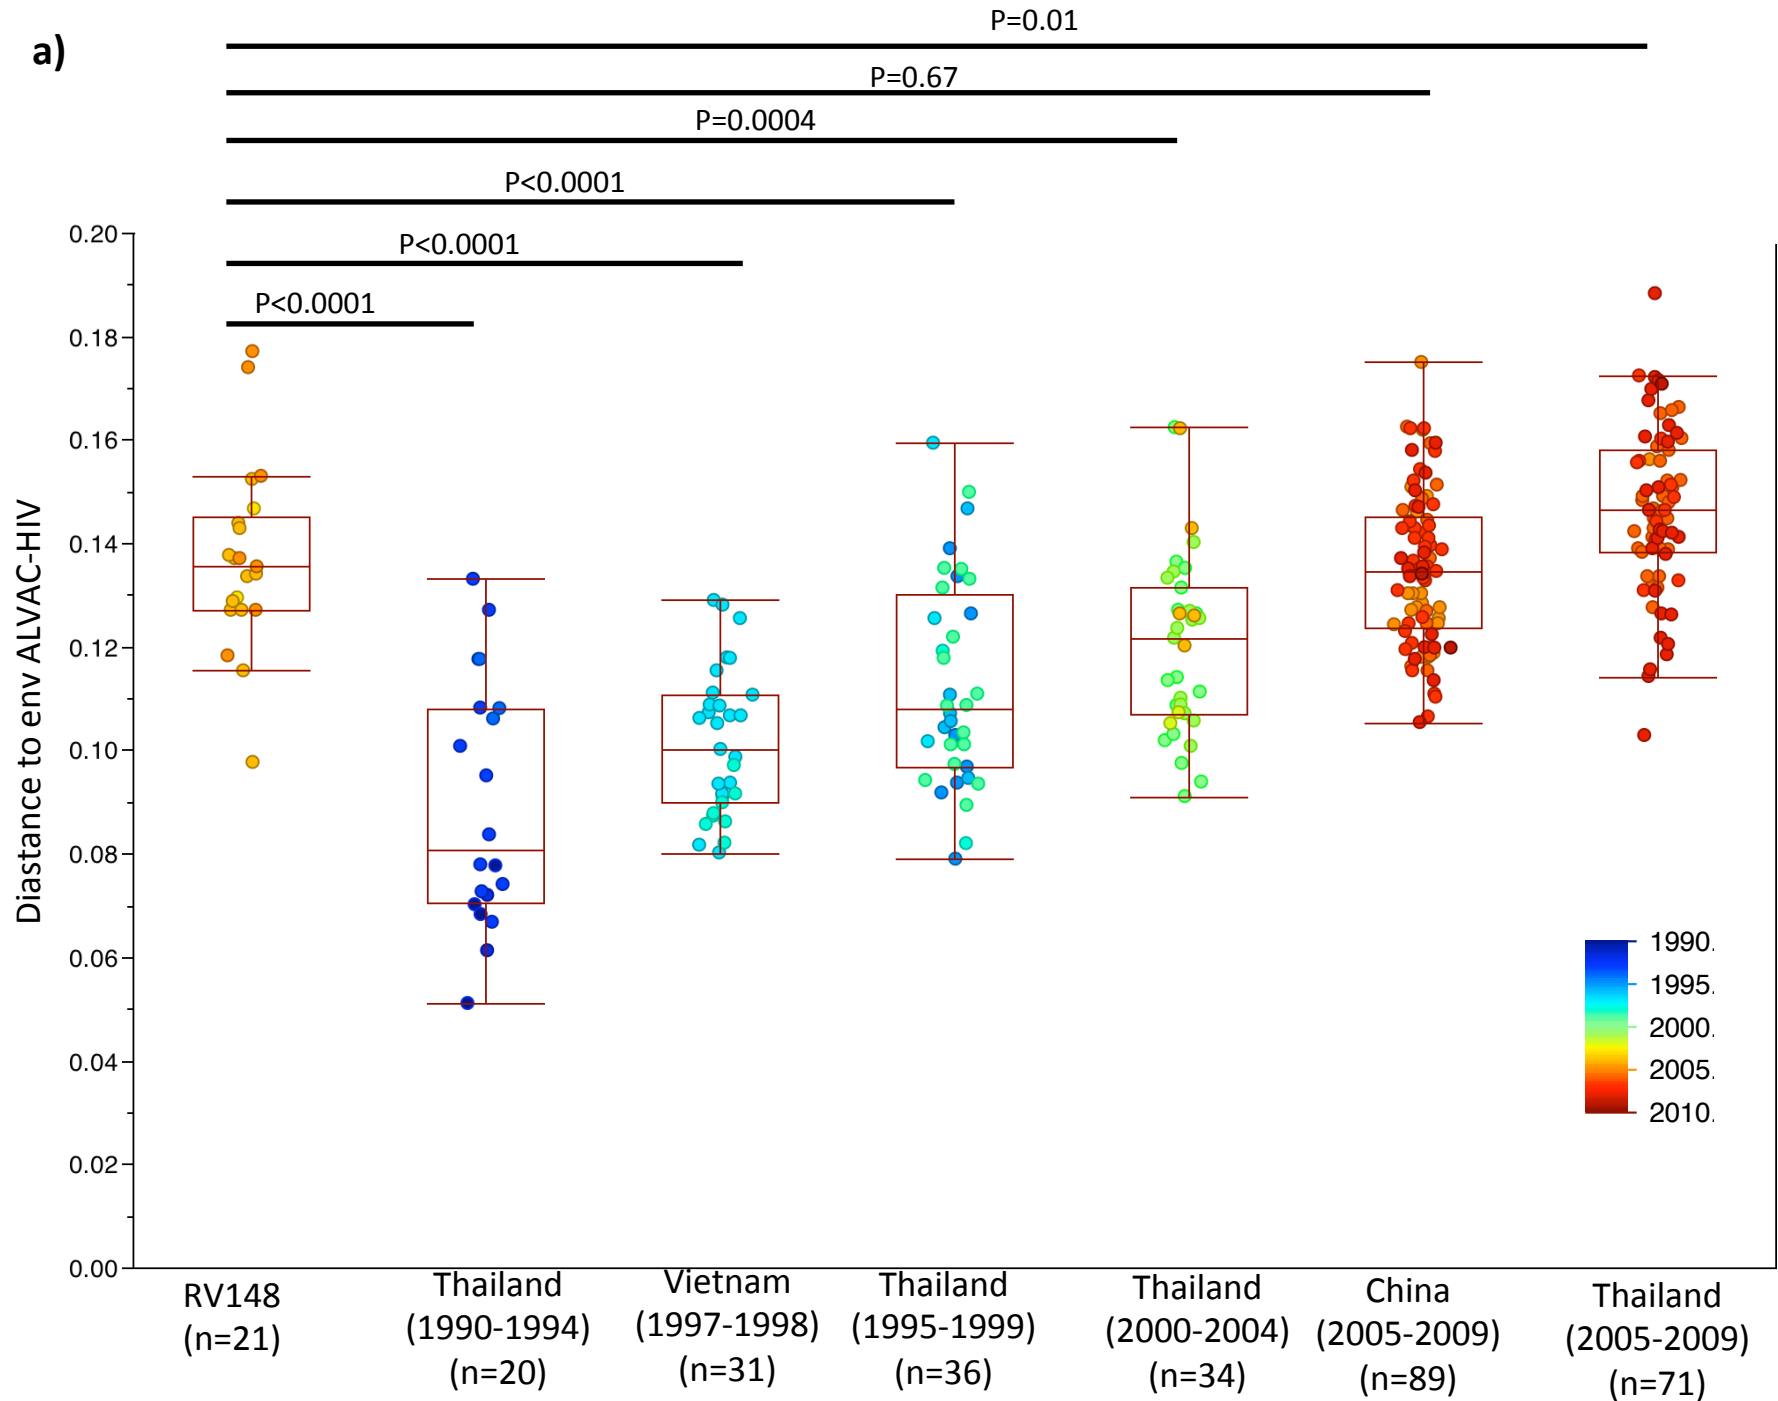

**b)**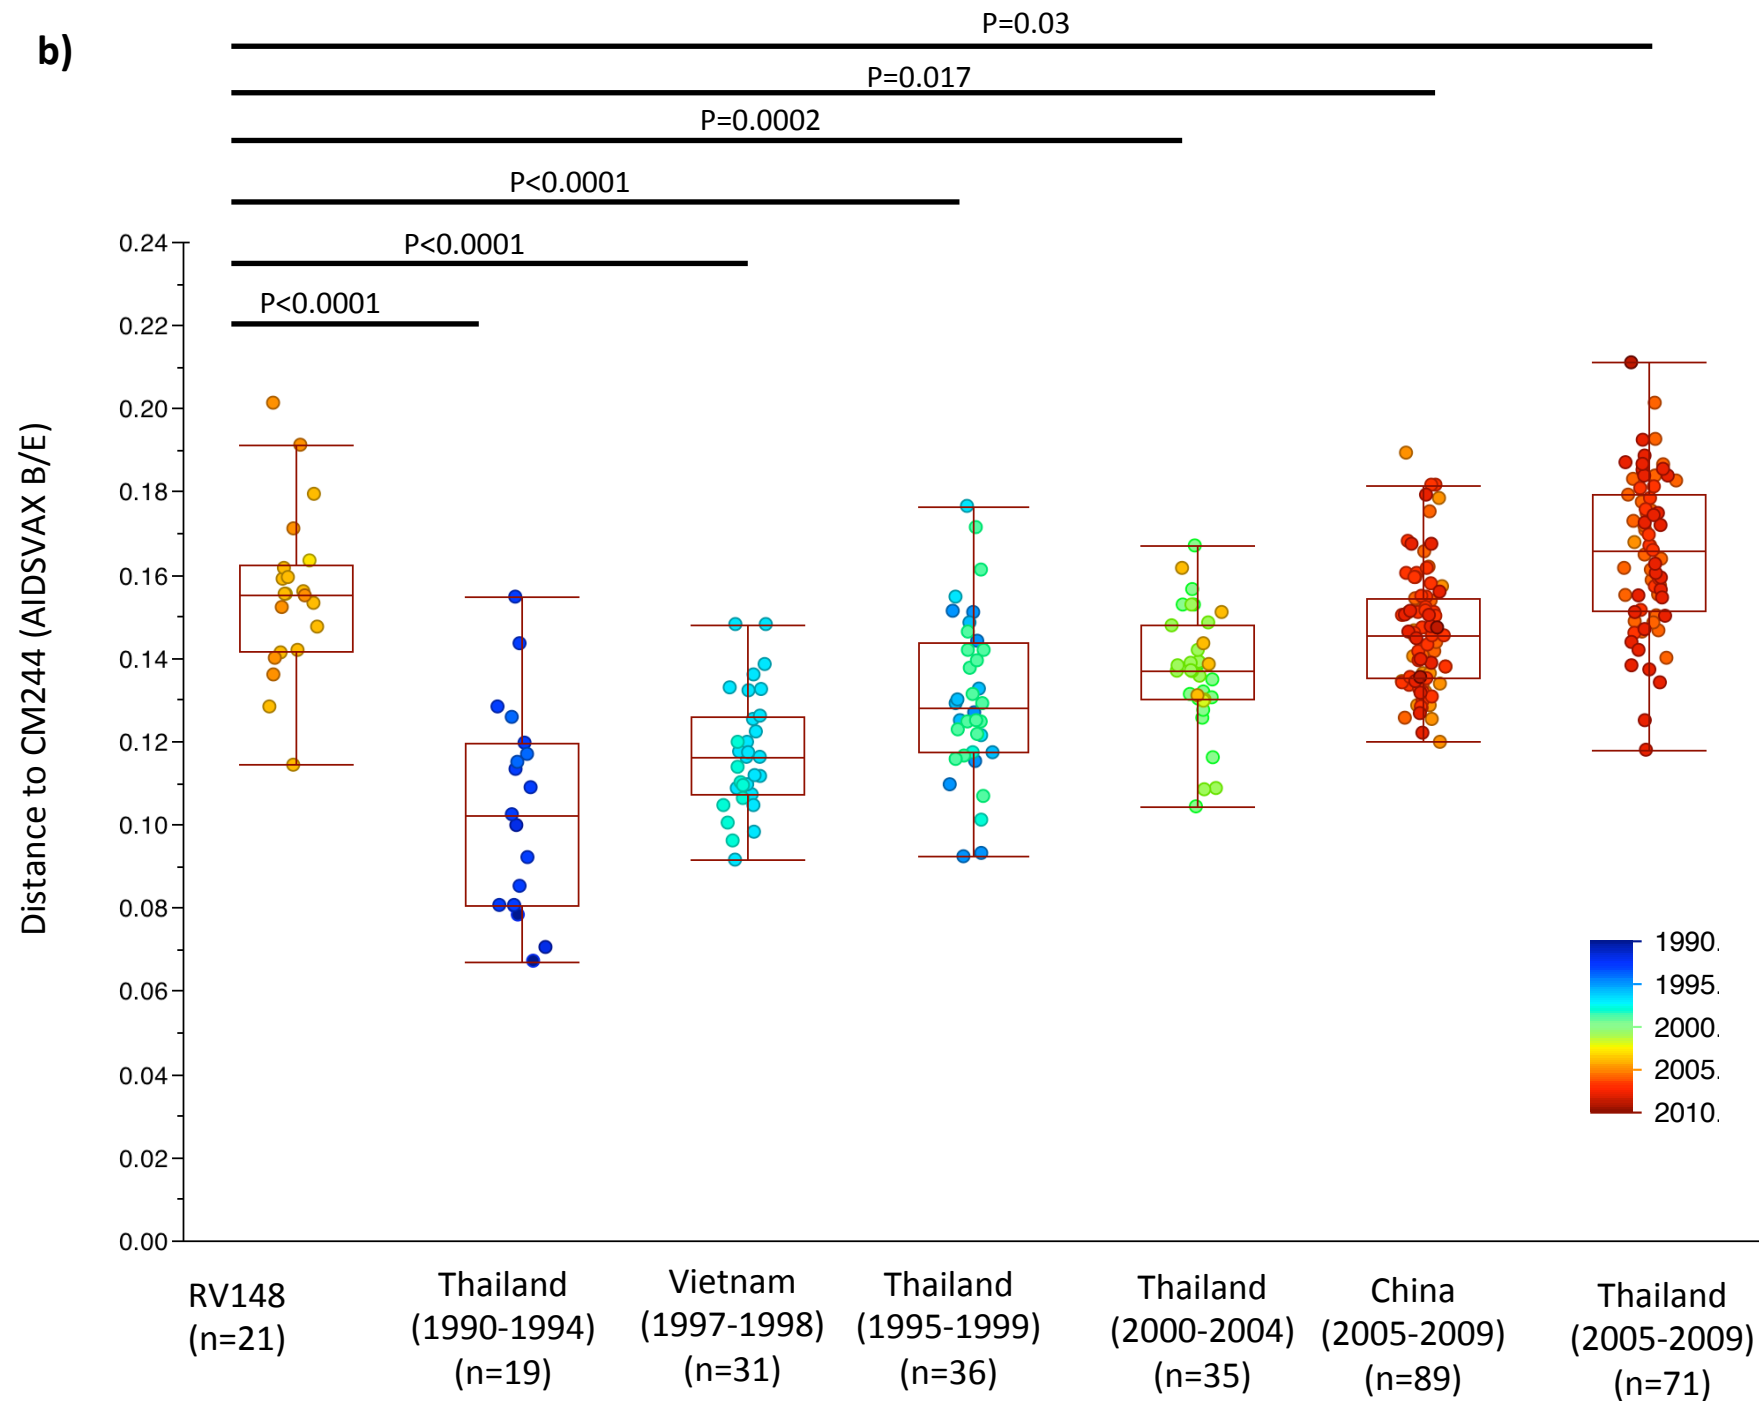

c)

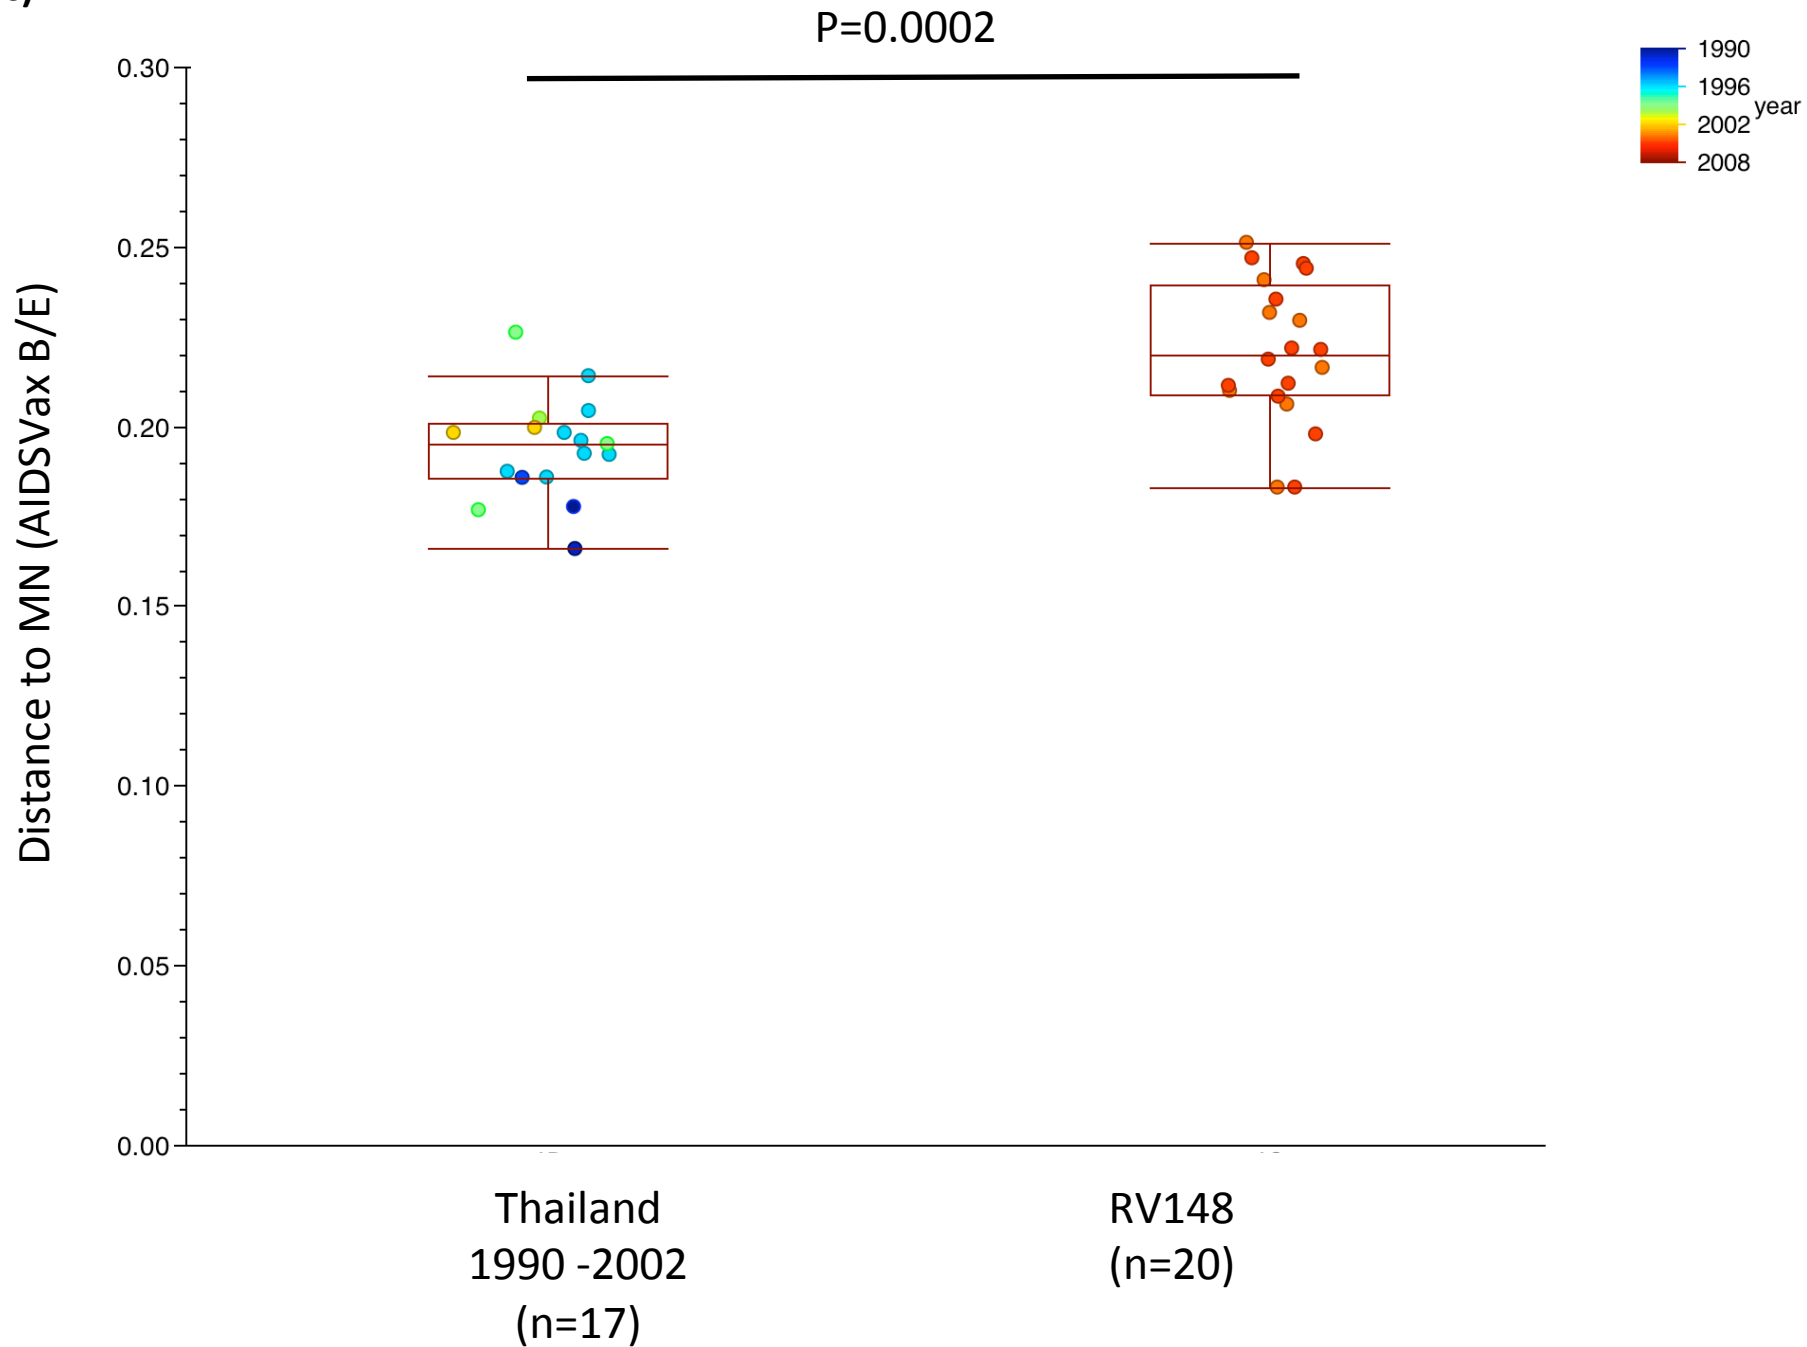

d)

P=0.08

P=0.38

P=0.07

P=0.0005

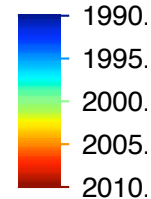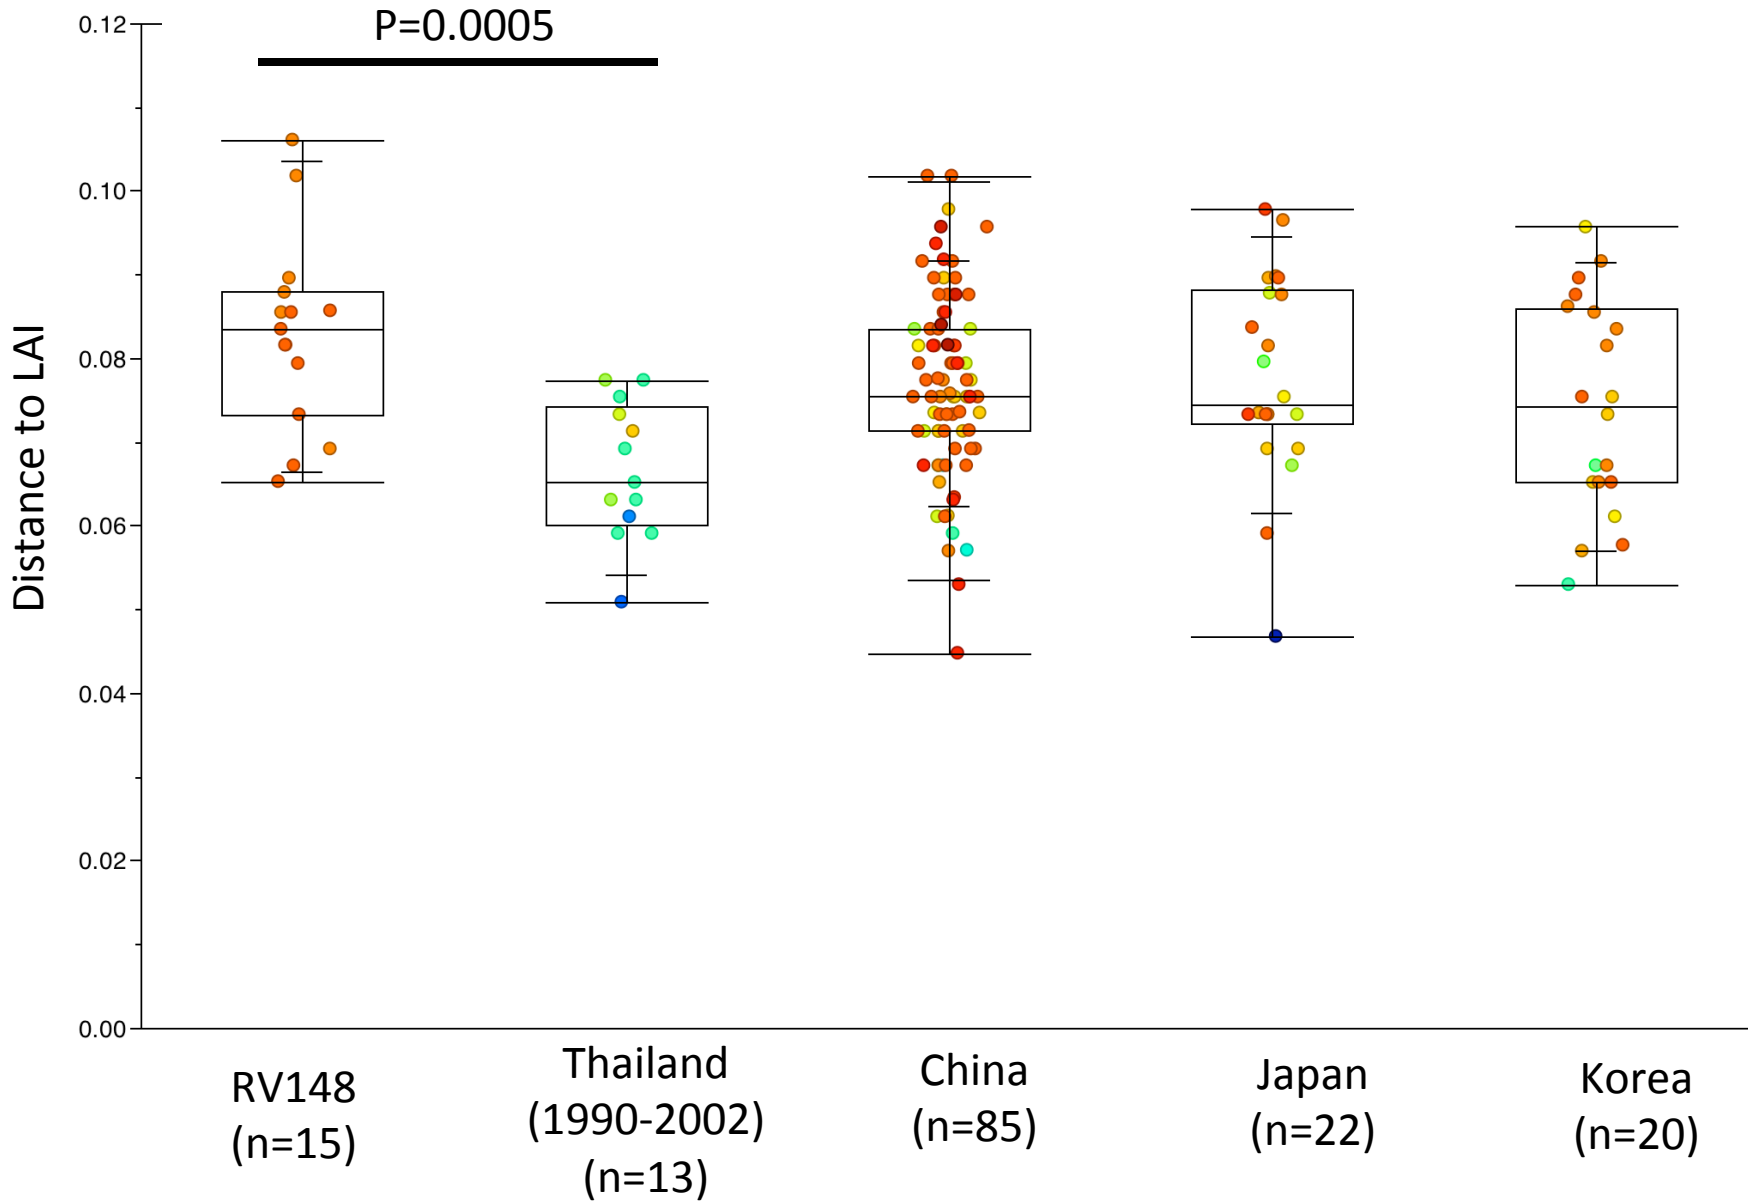

Supplement: JVI.03070-12_zjv999097731so1.pdf [file JVI.03070-12_zjv999097731so1.pdf]
